## CORRECTION

## Correction: Assessing factors that influence perceived burnout in postdoctoral fellows and identifying recommendations to support their well-being

Suzanne C. Harris, Emma Smits, Robert McGinty, Jacqueline M. Zeeman

The third author's name is spelled incorrectly. The correct name is: Robert McGinty. The correct citation is: Harris SC, Smits E, McGinty R, Zeeman JM (2026) Assessing factors that influence perceived burnout in postdoctoral fellows and identifying recommendations to support their well-being. PLoS One 21(3): e0344974. <https://doi.org/10.1371/journal.pone.0344974>.

[Table 1](#) was uploaded incorrectly. Please see the correct [Table 1](#) below.

### Reference

1. Harris SC, Smits E, McGinty R, Zeeman JM. Assessing factors that influence perceived burnout in postdoctoral fellows and identifying recommendations to support their well-being. PLoS One. 2026;21(3):e0344974. <https://doi.org/10.1371/journal.pone.0344974> PMID: [41843608](https://pubmed.ncbi.nlm.nih.gov/41843608/)

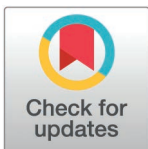

### OPEN ACCESS

**Citation:** Harris SC, Smits E, McGinty R, Zeeman JM (2026) Correction: Assessing factors that influence perceived burnout in postdoctoral fellows and identifying recommendations to support their well-being. PLoS One 21(4): e0347250. <https://doi.org/10.1371/journal.pone.0347250>

**Published:** April 14, 2026

**Copyright:** © 2026 Harris et al. This is an open access article distributed under the terms of the [Creative Commons Attribution License](https://creativecommons.org/licenses/by/4.0/), which permits unrestricted use, distribution, and reproduction in any medium, provided the original author and source are credited.

**Table 1. Burnout Themes and Sub-themes Rank Ordered by Prevalence.**

| All Postdoctoral Fellow Participants (n = 7)                                                                                                                                                                                                                                                                                                                                                                                                                                                                                             | Academic (non-Industry) Fellows (n = 5)                                                                                                                                                                                                                                                                                                                                                                                                                                                                                                  | Industry-Sponsored Fellows (n = 2)                                                                                                                                                                                                                    |
|------------------------------------------------------------------------------------------------------------------------------------------------------------------------------------------------------------------------------------------------------------------------------------------------------------------------------------------------------------------------------------------------------------------------------------------------------------------------------------------------------------------------------------------|------------------------------------------------------------------------------------------------------------------------------------------------------------------------------------------------------------------------------------------------------------------------------------------------------------------------------------------------------------------------------------------------------------------------------------------------------------------------------------------------------------------------------------------|-------------------------------------------------------------------------------------------------------------------------------------------------------------------------------------------------------------------------------------------------------|
| <b>Insufficient Resources<sup>#</sup></b>                                                                                                                                                                                                                                                                                                                                                                                                                                                                                                |                                                                                                                                                                                                                                                                                                                                                                                                                                                                                                                                          |                                                                                                                                                                                                                                                       |
| <ul style="list-style-type: none"> <li>Resources not connected <sup>#</sup></li> <li>Resources unavailable<sup>#</sup></li> <li>Insufficient parking or transportation<sup>^</sup></li> <li>Lack of parental support resources<sup>^</sup></li> </ul>                                                                                                                                                                                                                                                                                    | <ul style="list-style-type: none"> <li>Resources not connected <sup>#</sup></li> <li>Resources unavailable<sup>#</sup></li> </ul>                                                                                                                                                                                                                                                                                                                                                                                                        | <ul style="list-style-type: none"> <li>Resources not connected <sup>#</sup></li> <li>Resources unavailable<sup>#</sup></li> <li>Insufficient parking or transportation<sup>^</sup></li> <li>Lack of parental support resources<sup>^</sup></li> </ul> |
| <b>Lack of Belonging/Inclusion<sup>^</sup></b>                                                                                                                                                                                                                                                                                                                                                                                                                                                                                           |                                                                                                                                                                                                                                                                                                                                                                                                                                                                                                                                          |                                                                                                                                                                                                                                                       |
| Lack of/insufficient DEI <sup>^</sup><br><ul style="list-style-type: none"> <li>Lost trust in institutional DEI<sup>^</sup></li> <li>Inappropriately managed DEI situations<sup>^</sup></li> <li>Misaligned DEI representation <sup>^</sup></li> <li>Lack of diverse community<sup>^</sup></li> </ul> Implicit stereotypes <sup>^</sup><br>Prejudice or discrimination <sup>^</sup><br>Lack of belonging <sup>^</sup>                                                                                                                    | Lack of/insufficient DEI <sup>^</sup><br><ul style="list-style-type: none"> <li>Lost trust in institutional DEI<sup>^</sup></li> <li>Inappropriately managed DEI situations<sup>^</sup></li> <li>Misaligned DEI representation<sup>^</sup></li> <li>Lack of diverse community<sup>^</sup></li> </ul> Implicit stereotypes <sup>^</sup><br>Prejudice or discrimination <sup>^</sup><br>Lack of belonging <sup>^</sup>                                                                                                                     |                                                                                                                                                                                                                                                       |
| <b>Lack of Relational Support<sup>#</sup></b>                                                                                                                                                                                                                                                                                                                                                                                                                                                                                            |                                                                                                                                                                                                                                                                                                                                                                                                                                                                                                                                          |                                                                                                                                                                                                                                                       |
| Lack of personal support <sup>#</sup><br><ul style="list-style-type: none"> <li>Lack of supervisor support<sup>^</sup></li> <li>Lack of peer support<sup>^</sup></li> <li>Lack of coworker support<sup>#</sup></li> <li>Lack of faculty support<sup>^</sup></li> </ul> Lack of professional support <sup>^</sup><br><ul style="list-style-type: none"> <li>Lack of supervisor career support<sup>^</sup></li> <li>Lack of institutional career support<sup>^</sup></li> <li>Lack of international postdoc support<sup>^</sup></li> </ul> | Lack of personal support <sup>#</sup><br><ul style="list-style-type: none"> <li>Lack of supervisor support<sup>^</sup></li> <li>Lack of peer support<sup>^</sup></li> <li>Lack of coworker support<sup>#</sup></li> <li>Lack of faculty support<sup>^</sup></li> </ul> Lack of professional support <sup>^</sup><br><ul style="list-style-type: none"> <li>Lack of supervisor career support<sup>^</sup></li> <li>Lack of institutional career support<sup>^</sup></li> <li>Lack of international postdoc support<sup>^</sup></li> </ul> | Lack of personal support <sup>#</sup><br><ul style="list-style-type: none"> <li>Lack of coworker support<sup>#</sup></li> </ul>                                                                                                                       |
| <b>Lack of Respect/Value by Others<sup>#</sup></b>                                                                                                                                                                                                                                                                                                                                                                                                                                                                                       |                                                                                                                                                                                                                                                                                                                                                                                                                                                                                                                                          |                                                                                                                                                                                                                                                       |
| <ul style="list-style-type: none"> <li>Supervisor-postdoc power imbalance<sup>#</sup></li> <li>Lack of respect<sup>^</sup></li> <li>Lack of autonomy in work/research<sup>^</sup></li> <li>Time not respected<sup>#</sup></li> <li>Not feeling heard<sup>^</sup></li> </ul>                                                                                                                                                                                                                                                              | <ul style="list-style-type: none"> <li>Supervisor-postdoc power imbalance<sup>#</sup></li> <li>Lack of respect<sup>^</sup></li> <li>Lack of autonomy in work/research<sup>^</sup></li> <li>Not feeling heard<sup>^</sup></li> <li>Time not respected<sup>#</sup></li> </ul>                                                                                                                                                                                                                                                              | <ul style="list-style-type: none"> <li>Supervisor-postdoc power imbalance<sup>#</sup></li> <li>Time not respected<sup>#</sup></li> </ul>                                                                                                              |
| <b>Difficult Transition<sup>#</sup></b>                                                                                                                                                                                                                                                                                                                                                                                                                                                                                                  |                                                                                                                                                                                                                                                                                                                                                                                                                                                                                                                                          |                                                                                                                                                                                                                                                       |
| <ul style="list-style-type: none"> <li>Transition to position<sup>#</sup></li> <li>Transition to new institution<sup>#</sup></li> </ul>                                                                                                                                                                                                                                                                                                                                                                                                  | <ul style="list-style-type: none"> <li>Transition to position<sup>#</sup></li> <li>Transition to new institution<sup>#</sup></li> </ul>                                                                                                                                                                                                                                                                                                                                                                                                  | <ul style="list-style-type: none"> <li>Transition to new institution<sup>#</sup></li> <li>Transition to position<sup>#</sup></li> </ul>                                                                                                               |
| <b>Salary/Benefits<sup>^</sup></b>                                                                                                                                                                                                                                                                                                                                                                                                                                                                                                       |                                                                                                                                                                                                                                                                                                                                                                                                                                                                                                                                          |                                                                                                                                                                                                                                                       |
| <ul style="list-style-type: none"> <li>Insufficient salary/benefits<sup>^</sup></li> </ul>                                                                                                                                                                                                                                                                                                                                                                                                                                               | <ul style="list-style-type: none"> <li>Insufficient salary/benefits<sup>^</sup></li> </ul>                                                                                                                                                                                                                                                                                                                                                                                                                                               |                                                                                                                                                                                                                                                       |
| <b>Workload and Program Structure<sup>#</sup></b>                                                                                                                                                                                                                                                                                                                                                                                                                                                                                        |                                                                                                                                                                                                                                                                                                                                                                                                                                                                                                                                          |                                                                                                                                                                                                                                                       |
| <ul style="list-style-type: none"> <li>Unreasonable workload<sup>#</sup></li> <li>Unreasonable supervisor expectations<sup>^</sup></li> <li>Unexpected factors<sup>^</sup></li> <li>Lack of flexibility in position<sup>^</sup></li> </ul>                                                                                                                                                                                                                                                                                               | <ul style="list-style-type: none"> <li>Unreasonable supervisor expectations<sup>^</sup></li> <li>Unreasonable workload<sup>#</sup></li> <li>Unexpected factors<sup>^</sup></li> </ul>                                                                                                                                                                                                                                                                                                                                                    | <ul style="list-style-type: none"> <li>Unreasonable workload<sup>#</sup></li> <li>Lack of flexibility in position<sup>^</sup></li> </ul>                                                                                                              |

<sup>^</sup> Theme or subtheme unique to one subgroup; did not appear in all subgroups.

<sup>#</sup> Theme or subtheme present across all subgroups. Only themes and subthemes that achieved data saturation within the subgroup are reported.

<https://doi.org/10.1371/journal.pone.0347250.t001>
